# Supplementary material
Source: bioRxiv or medRxiv preprint supplement (https://www.biorxiv.org/highwire/filestream/125402/field_highwire_adjunct_files/1/414912-2.pdf)
Supplement: Supplementary file [file 414912-2.pdf]

Table S3. iJL1678-ME model modification (blocked reactions)

| Iter.    | Cat.                                        | ID         | Name                                                      | Formula                                                   | Subsystem                                   | Comments (When the reaction is turned on)                                                                                                                                                                                                                                                                                                                                                                                                                                                                                            |
|----------|---------------------------------------------|------------|-----------------------------------------------------------|-----------------------------------------------------------|---------------------------------------------|--------------------------------------------------------------------------------------------------------------------------------------------------------------------------------------------------------------------------------------------------------------------------------------------------------------------------------------------------------------------------------------------------------------------------------------------------------------------------------------------------------------------------------------|
| 1        | bp2                                         | EDD        | 6-phosphogluconate dehydratase                            | 6pgc_c $\rightarrow$ 2ddg6p_c + h2o_c                     | Pentose Phosphate Pathway                   | Create a major effect of steep acetate overflow elevation in high growth. Comparing to the main glycolytic pathway, it is metabolically less efficient but proteomically more efficient.                                                                                                                                                                                                                                                                                                                                             |
|          | bp1                                         | ICL        | Isocitrate lyase                                          | icit_c $\rightarrow$ glx_c + succ_c                       | Anaplerotic Reactions                       | Bypass for the main TCA cycle pathways from turning isocitrate to succinate, when ICL is turned on, Isocitrate dehydrogenase(ICDHr), 2-Oxoglutarate dehydrogenase(AKGDH) and Succinyl-CoA synthetase (ATP-forming,SUCOAS) would reduce. Ref. (1) and (2) shows that this reaction is off in higher growth. Ref. (3) shows that this reaction is converging to being off when the dynamic of respiration using enzyme kinetics is simulated.                                                                                          |
| 2        | bp1                                         | ABTA       | 4-aminobutyrate transaminase                              | 4abut_c + akg_c $\rightarrow$ glu_L_c + succal_c          | Arginine and Proline Metabolism             | Another backup pathway of succinate production, from 2-Oxoglutarate (akg). Respiration would be induced when it is on, since the flux through ETC(CYTBO3_4pp and ATPS4pp) would increase. As it requires the co-factor pyridoxal 5'-phosphate(2-) to get catalyzed(4), indicating that this reaction is regulated by the flux of other reactions(pyridoxal 5'-phosphate(2-) production, etc.).                                                                                                                                       |
| 3        |                                             | GLYAT      | Glycine C-acetyltransferase                               | accoa_c + gly_c $\rightarrow$ 2aobut_c + coa_c            | Glycine and Serine Metabolism               | A reaction that back up for the respiration. Reactions fluxes in TCA cycle would drop when this reaction is turned on. It also requires pyridoxal 5'-phosphate(2-) for the regulation.                                                                                                                                                                                                                                                                                                                                               |
| 4        |                                             | NADTRHD    | NAD transhydrogenase                                      | nad_c + nadph_c $\rightarrow$ nadh_c + nadp_c             | Oxidative Phosphorylation                   | A reaction that would make the transition between NAD and NADP metabolically more efficient. A notable effect when this reaction is turned on is that the reaction fluxes through ETC is elevated. Moreover, fluxes are yielded from the glycolytic pathway(EMP pathway) to the pentose phosphate pathway(PPP pathway, NADP synthesis). Ref(1) and (2) shows that the experimental flux through PPP is lower than the model's prediction, which indicates an extra regulation constraints upon NAD vs. NADP, EMP vs. PPP is missing. |
| 5        |                                             | ASPT       | L-aspartase                                               | asp_L_c $\rightarrow$ fum_c + nh4_c                       | Alanine and Aspartate Metabolism            | Ref. (1) and (2) shows that this reaction is off in higher growth. Ref.                                                                                                                                                                                                                                                                                                                                                                                                                                                              |
| 6        |                                             | IDOND      | L-idonate 5-dehydrogenase                                 | 5dglcn_c + h_c + nadh_c $\rightarrow$ idon_L_c + nad_c    | Alternate Carbon Metabolism                 | Building up a futile cycle with the reaction ICOND2, with a combining effect of NAD/NADP switching through transhydrogenase. It requires zinc ion as cofactor (5).                                                                                                                                                                                                                                                                                                                                                                   |
| 7        |                                             | FADRx2     | FAD reductase                                             | fad_c + h_c + nadph_c $\rightarrow$ fadh2_c + nadp_c      | Cofactor and Prosthetic Group Biosynthesis  | It requires FAD and FMN as cofactor.                                                                                                                                                                                                                                                                                                                                                                                                                                                                                                 |
| 8        |                                             | DAAD       | D-Amino acid dehydrogenase                                | ala_D_c + fad_c + h2o_c $\rightarrow$ fadh2_c + nh4_c +   | Alanine and Aspartate Metabolism            | Inducing the glutamate synthesis from 2-Oxoglutarate                                                                                                                                                                                                                                                                                                                                                                                                                                                                                 |
| 9        |                                             | FTHFD      | Formyltetrahydrofolate deformylase                        | 10fthf_c + h2o_c $\rightarrow$ for_c + h_c + thf_c        | Folate Metabolism                           | This reaction induce the respiration fluxes by degrading the purine synthesis substrate 10-Formyltetrahydrofolate to forlate, the forlate is then pumped to periplasm for transporting electron. There's enzyme regulations (purU) upon this reaction, which is activated by the methionine which costs the most enzyme (6) to get synthesized, and at the mean time, this reaction is inhibited by the glucogenic amino acid glycine (7).                                                                                           |
| 10       |                                             | TRSARr     | Tartronate semialdehyde reductase                         | 2h3oppa_n_c + h_c + nadh_c $\rightarrow$ glyc_R_c + nad_c | Alternate Carbon Metabolism                 | It is the upstream of the reaction hydroxypyruvate reductase (NADPH), however, the corresponding gene (ghrA/ghrB) is more preferable in reducing glyoxylate than hydroxypyruvate (8).                                                                                                                                                                                                                                                                                                                                                |
| 11       |                                             | ALATA_L2   | Alanine transaminase                                      | ala_L_c + pydx5p_c $\rightarrow$ pyam5p_c + pyr_c         | Cofactor and Prosthetic Group Biosynthesis  | The encoding genes, glyA and ItaE, has many other roles, where this reaction might be regulated by enzyme saturation.                                                                                                                                                                                                                                                                                                                                                                                                                |
| 12       |                                             | FLDR22     | Flavodoxin reductase (NADPH)                              | 2.0 FLAVODOXIN2-MONOMER_mod_Oxidized                      | Flavodoxin reductase (NADPH)                | The gene (fpr, fldA, fldB) requires FAD (9) or FMN (10) as cofactor. The effect of turning on this reaction is that it would reverse the direction of POR5 (Pyruvate synthase) from oxidizing pyruvate to reducing flavodoxin, where the gene (ydbK) requires [4Fe-4S] cluster as cofactor.                                                                                                                                                                                                                                          |
| 13       |                                             | FLDR21     | Flavodoxin reductase (NADPH)<br>(For flavodoxin1 monomer) | 2.0 FLAVODOXIN1-MONOMER_mod_Oxidized                      | Flavodoxin reductase (NADPH)                |                                                                                                                                                                                                                                                                                                                                                                                                                                                                                                                                      |
| 14       |                                             | PYAM5PO    | Pyridoxamine 5'-phosphate oxidase                         | h2o_c + o2_c + pyam5p_c $\rightarrow$ h2o2_c + nh4_c +    | Cofactor and Prosthetic Group Biosynthesis  | The gene (pdxH) requires FMN as cofactor. The model recording its keff=40 (1/s), however some study (11) shows that its kcat is 0.3 (1/s)                                                                                                                                                                                                                                                                                                                                                                                            |
| 15       |                                             | VPAMTr     | Valine-pyruvate aminotransferase                          | 3mob_c + ala_L_c $\rightarrow$ pyr_c + val_L_c            | Valine, Leucine, and Isoleucine Metabolism  |                                                                                                                                                                                                                                                                                                                                                                                                                                                                                                                                      |
| 16       |                                             | NADPHQR2   | NADPH Quinone Reductase (Ubiquinone)                      | h_c + nadph_c + q8_c $\rightarrow$ nadp_c + q8h2_c        | Oxidative Phosphorylation                   | Trading off NADH quinone reductase (NADH16pp), which has similar effect as NAD(P) transhydrogenase (NADTRHD), changing the NAD/NADP balance and make more carbon fluxes yielding to pentose phosphate pathway.                                                                                                                                                                                                                                                                                                                       |
| 17       |                                             | CTECOAI7   | 3-cis-2-trans-enoyl-CoA isomerase                         | hdcoa_c $\rightarrow$ hdd2coa_c                           | Membrane Lipid Metabolism                   | Acetyl-CoA metabolism                                                                                                                                                                                                                                                                                                                                                                                                                                                                                                                |
|          |                                             | AACPS31    | Acyl-[acyl-carrier-protein] synthetase (n-C)              | 1.0 EG50003-MONOMER_mod_pan4p + atp_c                     | Cell Envelope Biosynthesis                  | Acetyl-CoA metabolism                                                                                                                                                                                                                                                                                                                                                                                                                                                                                                                |
|          |                                             | AACPS41    | Acyl-[acyl-carrier-protein] synthetase (n-C)              | 1.0 EG50003-MONOMER_mod_pan4p + atp_c                     | Cell Envelope Biosynthesis                  |                                                                                                                                                                                                                                                                                                                                                                                                                                                                                                                                      |
|          |                                             | PUNP5      | Purine-nucleoside phosphorylase (Inosine)                 | ins_c + pi_c $\rightarrow$ hxan_c + r1p_c                 | Nucleotide Salvage Pathway                  | Adenine metabolism                                                                                                                                                                                                                                                                                                                                                                                                                                                                                                                   |
|          |                                             | R15BPk     | Ribose-1,5-bisphosphokinase                               | atp_c + r15bp_c $\rightarrow$ adp_c + prpp_c              | Alternate Carbon Metabolism                 | Upstream of histidine production                                                                                                                                                                                                                                                                                                                                                                                                                                                                                                     |
|          |                                             | FACOAIE161 | Fatty-acid-CoA thioesterase (hexadecanoate)               | h2o_c + hdcoa_c $\rightarrow$ coa_c + h_c + hdcea_c       | Cell Envelope Biosynthesis                  |                                                                                                                                                                                                                                                                                                                                                                                                                                                                                                                                      |
|          |                                             | NTD11      | 5'-nucleotidase (IMP)                                     | h2o_c + imp_c $\rightarrow$ ins_c + pi_c                  | Nucleotide Salvage Pathway                  |                                                                                                                                                                                                                                                                                                                                                                                                                                                                                                                                      |
|          |                                             | HXAND      | Hypoxanthine dehydrogenase                                | h2o_c + hxan_c + nad_c $\rightarrow$ h_c + nadh_c + xan_c | Nucleotide Salvage Pathway                  | Adenine metabolism                                                                                                                                                                                                                                                                                                                                                                                                                                                                                                                   |
|          |                                             | XPPT       | Xanthine phosphoribosyltransferase                        | prpp_c + xan_c $\rightarrow$ ppi_c + xmp_c                | Nucleotide Salvage Pathway                  | Guanine metabolism                                                                                                                                                                                                                                                                                                                                                                                                                                                                                                                   |
|          |                                             | R1PK       | Ribose 1-phosphokinase                                    | atp_c + r1p_c $\rightarrow$ adp_c + h_c + r15bp_c         | Alternate Carbon Metabolism                 |                                                                                                                                                                                                                                                                                                                                                                                                                                                                                                                                      |
| 18       | bp2                                         | EAR160x1   | Enoyl-[acyl-carrier-protein] reductase (NA)               | 1.0 EG50003-MONOMER_mod_pan4p_mod_t                       | Cell Envelope Biosynthesis                  | Acetyl-CoA to Hexadecanoate (palmitic acid)                                                                                                                                                                                                                                                                                                                                                                                                                                                                                          |
|          |                                             | EAR161x    | Enoyl-[acyl-carrier-protein] reductase (NA)               | 1.0 EG50003-MONOMER_mod_pan4p_mod_t                       | Cell Envelope Biosynthesis                  |                                                                                                                                                                                                                                                                                                                                                                                                                                                                                                                                      |
|          |                                             | FACOAIE120 | Fatty-acid-CoA thioesterase (dodecanoate)                 | ddcoa_c + h2o_c $\rightarrow$ coa_c + ddca_c + h_c        | Cell Envelope Biosynthesis                  |                                                                                                                                                                                                                                                                                                                                                                                                                                                                                                                                      |
|          |                                             | FACOAIE140 | Fatty-acid-CoA thioesterase (tetradecanoate)              | h2o_c + tdcoa_c $\rightarrow$ coa_c + h_c + ttdca_c       | Cell Envelope Biosynthesis                  |                                                                                                                                                                                                                                                                                                                                                                                                                                                                                                                                      |
|          |                                             | FACOAIE141 | Fatty-acid-CoA thioesterase (tetradecanoate)              | h2o_c + tdecoa_c $\rightarrow$ coa_c + h_c + ttdcea_c     | Cell Envelope Biosynthesis                  |                                                                                                                                                                                                                                                                                                                                                                                                                                                                                                                                      |
|          |                                             | AACPS11    | Acyl-[acyl-carrier-protein] synthetase (n-C)              | 1.0 EG50003-MONOMER_mod_pan4p + atp_c                     | Cell Envelope Biosynthesis                  |                                                                                                                                                                                                                                                                                                                                                                                                                                                                                                                                      |
|          |                                             | AACPS21    | Acyl-[acyl-carrier-protein] synthetase (n-C)              | 1.0 EG50003-MONOMER_mod_pan4p + atp_c                     | Cell Envelope Biosynthesis                  |                                                                                                                                                                                                                                                                                                                                                                                                                                                                                                                                      |
|          |                                             | AACPS71    | Acyl-[acyl-carrier-protein] synthetase (n-C)              | 1.0 EG50003-MONOMER_mod_pan4p + atp_c                     | Cell Envelope Biosynthesis                  |                                                                                                                                                                                                                                                                                                                                                                                                                                                                                                                                      |
|          |                                             | RNTR1c22   | Ribonucleoside-triphosphate reductase (U)                 | 2.0 FLAVODOXIN2-MONOMER + atp_c + 2.0 H                   | Nucleotide Salvage Pathway                  |                                                                                                                                                                                                                                                                                                                                                                                                                                                                                                                                      |
|          |                                             | RNTR2c22   | Ribonucleoside-triphosphate reductase (U)                 | 2.0 FLAVODOXIN2-MONOMER + 2.291649785                     | Nucleotide Salvage Pathway                  |                                                                                                                                                                                                                                                                                                                                                                                                                                                                                                                                      |
|          |                                             | RNTR3c22   | Ribonucleoside-triphosphate reductase (U)                 | 2.0 FLAVODOXIN2-MONOMER + ctp_c + 2.0 H                   | Nucleotide Salvage Pathway                  |                                                                                                                                                                                                                                                                                                                                                                                                                                                                                                                                      |
|          |                                             | RNTR4c22   | Ribonucleoside-triphosphate reductase (U)                 | 2.0 FLAVODOXIN2-MONOMER + 2.0 h_c + utp                   | Nucleotide Salvage Pathway                  |                                                                                                                                                                                                                                                                                                                                                                                                                                                                                                                                      |
|          |                                             | CTECOAI6   | 3-cis-2-trans-enoyl-CoA isomerase                         | tdecoa_c $\rightarrow$ td2coa_c                           | Membrane Lipid Metabolism                   |                                                                                                                                                                                                                                                                                                                                                                                                                                                                                                                                      |
|          |                                             |            |                                                           |                                                           |                                             |                                                                                                                                                                                                                                                                                                                                                                                                                                                                                                                                      |
| 20       | bp2                                         | FACOAIE80  | Fatty-acid-CoA thioesterase (octanoate)                   | h2o_c + octcoa_c $\rightarrow$ coa_c + h_c + octa_c       | Cell Envelope Biosynthesis                  | Acetyl-CoA metabolism                                                                                                                                                                                                                                                                                                                                                                                                                                                                                                                |
|          |                                             | FACOAIE100 | Fatty-acid-CoA thioesterase (decanoate)                   | dcacoa_c + h2o_c $\rightarrow$ coa_c + dca_c + h_c        | Cell Envelope Biosynthesis                  |                                                                                                                                                                                                                                                                                                                                                                                                                                                                                                                                      |
|          |                                             | AACPS81    | Acyl-[acyl-carrier-protein] synthetase (n-C)              | 1.0 EG50003-MONOMER_mod_pan4p + atp_c                     | Cell Envelope Biosynthesis                  |                                                                                                                                                                                                                                                                                                                                                                                                                                                                                                                                      |
|          |                                             | AACPS91    | Acyl-[acyl-carrier-protein] synthetase (n-C)              | 1.0 EG50003-MONOMER_mod_pan4p + atp_c                     | Cell Envelope Biosynthesis                  |                                                                                                                                                                                                                                                                                                                                                                                                                                                                                                                                      |
|          |                                             | EAR120x1   | Enoyl-[acyl-carrier-protein] reductase (NA)               | 1.0 EG50003-MONOMER_mod_pan4p_mod_t                       | Cell Envelope Biosynthesis                  |                                                                                                                                                                                                                                                                                                                                                                                                                                                                                                                                      |
|          |                                             | EAR121x1   | Enoyl-[acyl-carrier-protein] reductase (NA)               | 1.0 EG50003-MONOMER_mod_pan4p_mod_t                       | Cell Envelope Biosynthesis                  |                                                                                                                                                                                                                                                                                                                                                                                                                                                                                                                                      |
|          |                                             | EAR140x1   | Enoyl-[acyl-carrier-protein] reductase (NA)               | 1.0 EG50003-MONOMER_mod_pan4p_mod_t                       | Cell Envelope Biosynthesis                  |                                                                                                                                                                                                                                                                                                                                                                                                                                                                                                                                      |
|          |                                             | EAR141x1   | Enoyl-[acyl-carrier-protein] reductase (NA)               | 1.0 EG50003-MONOMER_mod_pan4p_mod_t                       | Cell Envelope Biosynthesis                  |                                                                                                                                                                                                                                                                                                                                                                                                                                                                                                                                      |
|          |                                             | RNTR2c21   | Ribonucleoside-triphosphate reductase (U)                 | 2.0 FLAVODOXIN1-MONOMER + gtp_c + 2.0 H                   | Nucleotide Salvage Pathway                  |                                                                                                                                                                                                                                                                                                                                                                                                                                                                                                                                      |
|          |                                             | RNTR3c21   | Ribonucleoside-triphosphate reductase (U)                 | 2.0 FLAVODOXIN1-MONOMER + ctp_c + 2.0 H                   | Nucleotide Salvage Pathway                  |                                                                                                                                                                                                                                                                                                                                                                                                                                                                                                                                      |
|          |                                             | RNTR4c21   | Ribonucleoside-triphosphate reductase (U)                 | 2.0 FLAVODOXIN1-MONOMER + 2.0 h_c + utp                   | Nucleotide Salvage Pathway                  |                                                                                                                                                                                                                                                                                                                                                                                                                                                                                                                                      |
|          |                                             | POR51      | Pyruvate synthase                                         | 2.0 FLAVODOXIN1-MONOMER + accoa_c + cd                    | Pyruvate Metabolism                         |                                                                                                                                                                                                                                                                                                                                                                                                                                                                                                                                      |
|          |                                             |            |                                                           |                                                           |                                             |                                                                                                                                                                                                                                                                                                                                                                                                                                                                                                                                      |
|          |                                             | 21         | bp2                                                       | EAR40x1                                                   | Enoyl-[acyl-carrier-protein] reductase (NA) |                                                                                                                                                                                                                                                                                                                                                                                                                                                                                                                                      |
| EAR60x1  | Enoyl-[acyl-carrier-protein] reductase (NA) |            |                                                           | 1.0 EG50003-MONOMER_mod_pan4p_mod_t                       | Cell Envelope Biosynthesis                  | Acetyl-CoA metabolism                                                                                                                                                                                                                                                                                                                                                                                                                                                                                                                |
| EAR80x1  | Enoyl-[acyl-carrier-protein] reductase (NA) |            |                                                           | 1.0 EG50003-MONOMER_mod_pan4p_mod_t                       | Cell Envelope Biosynthesis                  | Acetyl-CoA metabolism                                                                                                                                                                                                                                                                                                                                                                                                                                                                                                                |
| EAR100x1 | Enoyl-[acyl-carrier-protein] reductase (NA) |            |                                                           | 1.0 EG50003-MONOMER_mod_pan4p_mod_t                       | Cell Envelope Biosynthesis                  | Acetyl-CoA metabolism                                                                                                                                                                                                                                                                                                                                                                                                                                                                                                                |
|          |                                             |            |                                                           |                                                           |                                             |                                                                                                                                                                                                                                                                                                                                                                                                                                                                                                                                      |

- Reference**
- Nanchen A, Schicker A, Sauer U (2006) Nonlinear dependency of intracellular fluxes on growth rate in miniaturized continuous cultures of *Escherichia coli*. *Appl Environ Microbiol* 72(2):1164–1172.
  - Novak M, Pfeiffer T, Lenski RE, Sauer U, Bonhoeffer S (2006) Experimental tests for an evolutionary trade-off between growth rate and yield in *E. coli*. *Am Nat* 168(2):242–251.
  - von Wulffen J, RecogNice-Team, Sawodny O, Feuer R (2016) Transition of an Anaerobic *Escherichia coli* Culture to Aerobiosis: Balancing mRNA and Protein Levels in a Demand-Directed Dynamic Flux Balance Analysis. *PLoS One* 11(7):e0158711.
  - Liu, Wenshe, Peter E. Peterson, James A. Langston, Xueguang Jin, Xianzhi Zhou, Andrew J. Fisher, and Michael D. Toney. 2005. "Kinetic and Crystallographic Analysis of Active Site Mutants of *Escherichia coli* Gamma-Aminobutyrate Aminotransferase." *Biochem Biophys Res Commun* 331(4):1155–1160.
  - Bausch, Christoph, et al. "Sequence analysis of the GntII (subsidiary) system for gluconate metabolism reveals a novel pathway for L-Idonic acid catabolism in *Escherichia coli*." *Journal of bacteriology* 180.14 (1998): 3704-3710.
  - Meinzel, T., Y. Mechulam, and S. Blanquet. "Methionine as translation start signal: a review of the enzymes of the pathway in *Escherichia coli*." *Biochimie* 75.12 (1993): 1061-1075.
  - Nagy, Peter L., et al. "Formyltetrahydrofolate hydrolase, a regulatory enzyme that functions to balance pools of tetrahydrofolate and one-carbon tetrahydrofolate adducts in *Escherichia coli*." *Journal of bacteriology* 177.5 (1995): 1292-1298.
  - Hubbard, Brian K., et al. "Evolution of enzymatic activities in the enolase superfamily: characterization of the (D)-glucarate/galactarate catabolic pathway in *Escherichia coli*." *Biochemistry* 37.41 (1998): 14369-14375.
  - Bianchi, V., et al. "Escherichia coli ferredoxin NADP+ reductase: activation of E. coli anaerobic ribonucleotide reduction, cloning of the gene (fpr), and overexpression of the protein." *Journal of bacteriology* 175.6 (1993): 1590-1595.
  - Jarrett, Joseph T., et al. "The mechanism of adenosylmethionine-dependent activation of methionine synthase: a rapid kinetic analysis of intermediates in reductive methylation of cob (II) alamin enzyme." *Biochemistry* 37.36 (1998): 12649-12658.
  - Di Salvo, Martino, et al. "Expression, Purification, and Characterization of Recombinant *Escherichia coli* Pyridoxine 5'-Phosphate Oxidase." *Protein expression and purification* 13.3 (1998): 349-356.

| Table S4. Essential exchanges |              |                       |
|-------------------------------|--------------|-----------------------|
| Num.                          | ID           | Exchanging component  |
| 1                             | EX_5mtr_e    | 5-Methylthio-D-ribose |
| 2                             | EX_RNase_m16 | Ribonuclease M16      |
| 3                             | EX_RNase_m23 | Ribonuclease M23      |
| 4                             | EX_RNase_m5  | Ribonuclease M5       |
| 5                             | EX_ac_e      | Acetate               |
| 6                             | EX_co2_e     | CO <sub>2</sub>       |
| 7                             | EX_cobalt2_e | Co <sup>2+</sup>      |
| 8                             | EX_cu2_e     | Cu <sup>2+</sup>      |
| 9                             | EX_fe2_e     | Fe <sup>2+</sup>      |
| 10                            | EX_glc_D_e   | D-Glucose             |
| 11                            | EX_h2o_e     | H <sub>2</sub> O      |
| 12                            | EX_h_e       | H <sup>+</sup>        |
| 13                            | EX_k_e       | potassium             |
| 14                            | EX_meoh_e    | Methanol              |
| 15                            | EX_mg2_e     | magnesium             |
| 16                            | EX_mn2_e     | Mn <sup>2+</sup>      |
| 17                            | EX_mobd_e    | Molybdate             |
| 18                            | EX_nh4_e     | Ammonium              |
| 19                            | EX_o2_e      | O <sub>2</sub>        |
| 20                            | EX_pi_e      | Phosphate             |
| 21                            | EX_slnt_e    | selenite              |
| 22                            | EX_so4_e     | Sulfate               |
| 23                            | EX_tl_c      | thallium ion          |
| 24                            | EX_zn2_e     | Zinc                  |

Table S5. Solution space variation (Below)

| Iter. | ID       | Name                                                       | Reaction                                                            | Subsystem                                          | Comments (effects when the reaction is turned on)                                                                                                                                                                                                                                                                                                               |
|-------|----------|------------------------------------------------------------|---------------------------------------------------------------------|----------------------------------------------------|-----------------------------------------------------------------------------------------------------------------------------------------------------------------------------------------------------------------------------------------------------------------------------------------------------------------------------------------------------------------|
| 1     | GLCt2pp  | D-glucose transport in via proton symport (periplasm)      | $glc\_D\_p + h\_p \rightleftharpoons glc\_D\_c + h\_c$              | Transport, Inner Membrane                          | The energetic efficiency of respiration gets reduced. Succinyl-CoA synthetase (ADP-forming) gets turned off. More protons get produced in the cytosol by CO <sub>2</sub> through HCO <sub>3</sub> equilibration reaction. Flux through pentose phosphate pathway gets induced where yielding the glycolytic flux. Less ATP is synthesized through ATP synthase. |
| 2     | GLYCLTDy | Glycolate dehydrogenase (NADP)                             | $glx\_c + h\_c + nadph\_c \rightarrow glyclt\_c + nadp\_c$          | Glyoxylate Metabolism                              | Absorbing protons into the metabolites, causing an energy waste. At the meantime, instead of pumping protons, quinone are reduced through Glycolate oxidase, wasting the energy source within the electric transport chain.                                                                                                                                     |
| 3     | G3PD5    | Glycerol-3-phosphate dehydrogenase (ubiquinone-8)          | $glyc3p\_c + q8\_c \rightarrow dhap\_c + q8h2\_c$                   | Oxidative Phosphorylation                          | A energetic wasteful alternative of the ETC reactions.                                                                                                                                                                                                                                                                                                          |
| 4     | NADPHQR3 | NADPH Quinone Reductase (Menaquinone-8)                    | $h\_c + mqn8\_c + nadph\_c \rightarrow mql8\_c + nadp\_c$           | Oxidative Phosphorylation                          | Yielding the glycolytic flux to pentose phosphate pathway. Wasting one proton. Fumarate reductase (FRD2) gets activated, yielding the flux from acetate production to TCA cycle.                                                                                                                                                                                |
| 5     | NADPHQR4 | NADPH Quinone Reductase (2-Demethylmenaquinone-8)          | $2dmmq8\_c + h\_c + nadph\_c \rightarrow 2dmmql8\_c + nadp\_c$      | Oxidative Phosphorylation                          | Yielding the glycolytic flux to pentose phosphate pathway. Wasting one proton. Fumarate reductase (FRD3) gets activated, yielding the flux from acetate production to TCA cycle.                                                                                                                                                                                |
| 6     | SERD_L   | L-serine deaminase                                         | $ser\_L\_c \rightarrow nh4\_c + pyr\_c$                             | Glycine and Serine Metabolism                      | Both reactions are degrading amino acids to pyruvate. The flux through pyruvate kinase (PYK) is eliminated, where the PYK ATP production is yielded to ATP synthase. More CO <sub>2</sub> is also secreted, showing that the respiration got level up, delaying the onset of acetate production.                                                                |
| 7     | TRPAS2   | Tryptophanase (L-tryptophan)                               | $h2o\_c + trp\_L\_c \rightleftharpoons indole\_c + nh4\_c + pyr\_c$ | Tyrosine, Tryptophan, and Phenylalanine Metabolism |                                                                                                                                                                                                                                                                                                                                                                 |
| 8     | G3PD6    | Glycerol-3-phosphate dehydrogenase (menaquinone-8)         | $glyc3p\_c + mqn8\_c \rightarrow dhap\_c + mql8\_c$                 | Oxidative Phosphorylation                          | A energetic wasteful alternative of the ETC reactions. Fumarate reductase (FRD2) gets activated, yielding the flux from acetate production to TCA cycle.                                                                                                                                                                                                        |
| 9     | G3PD7    | Glycerol-3-phosphate dehydrogenase (demethylmenaquinone-8) | $2dmmq8\_c + glyc3p\_c \rightarrow 2dmmql8\_c + dhap\_c$            | Oxidative Phosphorylation                          | A energetic wasteful alternative of the ETC reactions. Fumarate reductase (FRD3) gets activated, yielding the flux from acetate production to TCA cycle.                                                                                                                                                                                                        |
| 10    | LALDO3   | L-Lactaldehyde:NADP+ 1-oxidoreductase                      | $h\_c + mthgl\_c + nadph\_c \rightarrow lald\_L\_c + nadp\_c$       | Methylglyoxal Metabolism                           | Wasting a proton as an alternative of the ETC reactions. The flux through pyruvate kinase (PYK) is eliminated. CO <sub>2</sub> secretion is leveled up.                                                                                                                                                                                                         |
| 11    | LSERDhr  | L-serine dehydrogenase                                     | $nadp\_c + ser\_L\_c \rightleftharpoons 2amsa\_c + h\_c + nadph\_c$ | Glycine and Serine Metabolism                      | The flux through pyruvate kinase (PYK) is eliminated. More CO <sub>2</sub> is secreted.                                                                                                                                                                                                                                                                         |

| Table S6. Solution space variation (Above) |           |                                                           |                                                                   |                                        |                                                                                                                                                                                                                                                                                                                                                                                                                                                                                    |                                                                                                                                                                               |
|--------------------------------------------|-----------|-----------------------------------------------------------|-------------------------------------------------------------------|----------------------------------------|------------------------------------------------------------------------------------------------------------------------------------------------------------------------------------------------------------------------------------------------------------------------------------------------------------------------------------------------------------------------------------------------------------------------------------------------------------------------------------|-------------------------------------------------------------------------------------------------------------------------------------------------------------------------------|
| Iter.                                      | ID        | Name                                                      | Reaction                                                          | Subsystem                              | Comments (effects when the reaction is turned on)                                                                                                                                                                                                                                                                                                                                                                                                                                  | Secondary Comments                                                                                                                                                            |
| 1                                          | THD2pp    | NAD(P) transhydrogenase (periplasm)                       | $2.0 h_p + nadh_c + nadp_c \rightarrow 2.0 h_c + nad_c + nadph_c$ | Oxidative Phosphorylation              | A proton pump gradient against the ATP synthase (ATPS4rpp). Flux through pentose phosphate pathway is yielding to main glycolytic pathway.                                                                                                                                                                                                                                                                                                                                         |                                                                                                                                                                               |
| 2                                          | NADH5     | NADH dehydrogenase (ubiquinone-8 )                        | $h_c + nadh_c + q8_c \rightarrow nad_c + q8h2_c$                  | Oxidative Phosphorylation              | Trading off NADH dehydrogenase (NADH16pp, which pumps 3 protons to the periplasm), . Via NADH5, no proton get pumped to the periplasm.                                                                                                                                                                                                                                                                                                                                             |                                                                                                                                                                               |
| 3                                          | ALDD2y    | Aldehyde dehydrogenase (acetaldehyde, NADP)               | $acald_c + h2o_c + nadp_c \rightarrow ac_c + 2.0 h_c + nadph_c$   | Alternate Carbon Metabolism            | With the inverse acetaldehyde dehydrogenase (acetylating, ACALD, $accoa_c + h_c + nadh_c \rightarrow acald_c + coa_c + nad_c$ ), a futile cycle for acetaldehyde is created, with extra acetate production.                                                                                                                                                                                                                                                                        |                                                                                                                                                                               |
| 4                                          | POX       | Pyruvate oxidase                                          | $h2o_c + pyr_c + q8_c \rightarrow ac_c + co2_c + q8h2_c$          | Oxidative Phosphorylation              | An acetate production reaction that alternates the proton pumping quinone reductase in electric transport chain. The flux through acetate kinase (ACKr) gets reduced.                                                                                                                                                                                                                                                                                                              |                                                                                                                                                                               |
| 5                                          | ME2       | Malic enzyme (NADP)                                       | $mal\_L_c + nadp_c \rightarrow co2_c + nadph_c + pyr_c$           | Anaplerotic Reactions                  | Trading off malate dehydrogenase (MDH), the second last step of the TCA cycle, turning malate oxaloacetate, then to citrate. ME2 turns malate to pyruvate, emitting CO2, and feeding more pyruvate for acetate production.                                                                                                                                                                                                                                                         |                                                                                                                                                                               |
| 6                                          | LDH_D2    | D-lactate dehydrogenase                                   | $lac\_D_c + q8_c \rightarrow pyr_c + q8h2_c$                      | Oxidative Phosphorylation              | Alternative for the proton pumping quinone reductase. Flux through pentose phosphate pathway and cytochrome oxidase get increased. ATP synthase flux also increases. Main glycolytic pathway fluxes are reduced.                                                                                                                                                                                                                                                                   |                                                                                                                                                                               |
| 7                                          | GLYCLTDx  | Glycolate dehydrogenase (NAD)                             | $glx_c + h_c + nadh_c \rightarrow glyclt_c + nad_c$               | Glyoxylate Metabolism                  | Pentose phosphate pathway fluxes get induced, yielded from the main glycolytic pathway.                                                                                                                                                                                                                                                                                                                                                                                            |                                                                                                                                                                               |
| 8                                          | NADH10    | NADH dehydrogenase (menaquinone-8 & 0 protons)            | $h_c + mqn8_c + nadh_c \rightarrow mql8_c + nad_c$                | Oxidative Phosphorylation              | Introducing a futile cycle between fumarate and succinate in the TCA cycle, via fumarate reductase (FRD2) and succinate dehydrogenase (SUCDi), and consequently trading off NADH16pp as a poor proton pump alternatives.                                                                                                                                                                                                                                                           |                                                                                                                                                                               |
| 9                                          | MDH3      | Malate dehydrogenase (menaquinone 8 as acceptor)          | $mal\_L_c + mqn8_c \rightarrow mql8_c + oaa_c$                    | Citric Acid Cycle                      |                                                                                                                                                                                                                                                                                                                                                                                                                                                                                    |                                                                                                                                                                               |
| 10                                         | MDH2      | Malate dehydrogenase (ubiquinone 8 as acceptor)           | $mal\_L_c + q8_c \rightarrow oaa_c + q8h2_c$                      | Citric Acid Cycle                      |                                                                                                                                                                                                                                                                                                                                                                                                                                                                                    |                                                                                                                                                                               |
| 11                                         | CU2R      | NADH:quinone oxidoreductase II                            | $cu2_c + nadh_c \rightarrow cu_c + h_c + nad_c$                   | Oxidative Phosphorylation              |                                                                                                                                                                                                                                                                                                                                                                                                                                                                                    |                                                                                                                                                                               |
| 12                                         | LDH_D     | D-lactate dehydrogenase                                   | $lac\_D_c + nad_c \rightleftharpoons h_c + nadh_c + pyr_c$        | Pyruvate Metabolism                    |                                                                                                                                                                                                                                                                                                                                                                                                                                                                                    |                                                                                                                                                                               |
| 13                                         | MALt2_3pp | Malate transport via proton symport (3 H) (periplasm)     | $3.0 h_p + mal\_L_p \rightarrow 3.0 h_c + mal\_L_c$               | Transport, Inner Membrane              | Causing the pathway switch that malate dehydrogenase (MDH, $mal\_L_c + nad_c \rightleftharpoons h_c + nadh_c + oaa_c$ ) shifting to malic enzyme (ME1, $mal\_L_c + nad_c \rightleftharpoons co2_c + nadh_c + pyr_c$ ), and pyruvate kinase (PYK, $adp_c + h_c + pep_c \rightleftharpoons atp_c + pyr_c$ ) shifting to phosphoenolpyruvate carboxylase (PPC, $co2_c + h2o_c + pep_c \rightleftharpoons h_c + oaa_c + pi_c$ ), causing the overall effect of wasting 1 atp molecule. | Introducing TCA intermediate metabolites, which reduces the TCA flux, yielding to the backup pathways                                                                         |
| 14                                         | SUCct3pp  | Succinate transport out via proton antiport (periplasm)   | $h_p + succ_c \rightarrow h_c + succ_p$                           | Transport, Inner Membrane              |                                                                                                                                                                                                                                                                                                                                                                                                                                                                                    |                                                                                                                                                                               |
| 15                                         | FE2t3pp   | Iron (Fe+2) transport out via proton antiport (periplasm) | $fe2_c + h_p \rightarrow fe2_p + h_c$                             | Inorganic Ion Transport and Metabolism |                                                                                                                                                                                                                                                                                                                                                                                                                                                                                    |                                                                                                                                                                               |
| 16                                         | ALDD2x    | Aldehyde dehydrogenase (acetaldehyde, NAD)                | $acald_c + h2o_c + nad_c \rightarrow ac_c + 2.0 h_c + nadh_c$     | Alternate Carbon Metabolism            |                                                                                                                                                                                                                                                                                                                                                                                                                                                                                    |                                                                                                                                                                               |
| 17                                         | MALt2_2pp | Malate transport via proton symport (2 H) (periplasm)     | $2.0 h_p + mal\_L_p \rightarrow 2.0 h_c + mal\_L_c$               | Transport, Inner Membrane              |                                                                                                                                                                                                                                                                                                                                                                                                                                                                                    |                                                                                                                                                                               |
| 18                                         | GART      | GAR transformylase-T                                      | $atp_c + for_c + gar_c \rightarrow adp_c + fgam_c + h_c + pi_c$   | Purine and Pyrimidine Biosynthesis     |                                                                                                                                                                                                                                                                                                                                                                                                                                                                                    |                                                                                                                                                                               |
| 19                                         | FTHFLi    | Formate-tetrahydrofolate ligase                           | $atp_c + for_c + thf_c \rightarrow 10thf_c + adp_c + pi_c$        | Folate Metabolism                      |                                                                                                                                                                                                                                                                                                                                                                                                                                                                                    |                                                                                                                                                                               |
| 20                                         | MG2tpp    | Magnesium (+2) transport in via diffusion                 | $mg2_p \rightarrow mg2_c$                                         | Inorganic Ion Transport and Metabolism | Causing the pathway switch that malate dehydrogenase (MDH, $mal\_L_c + nad_c \rightleftharpoons h_c + nadh_c + oaa_c$ ) shifting to malic enzyme (ME1, $mal\_L_c + nad_c \rightleftharpoons co2_c + nadh_c + pyr_c$ ), and pyruvate kinase (PYK, $adp_c + h_c + pep_c \rightleftharpoons atp_c + pyr_c$ ) shifting to phosphoenolpyruvate carboxylase (PPC, $co2_c + h2o_c + pep_c \rightleftharpoons h_c + oaa_c + pi_c$ ), causing the overall effect of wasting 1 atp molecule. | Lower energetic efficiencies, comparing to the Magnesium (Mg+2) transport in/out via proton antiport (periplasm) (MG2t3_2pp, $2.0 h_c + mg2_p \rightarrow mg2_c + 2.0 h_p$ ). |
| 21                                         | MG2uabcpp | Magnesium (Mg+2) ABC transporter (ubtake, periplasm)      | $atp_c + h2o_c + mg2_p \rightarrow adp_c + h_c + mg2_c + pi_c$    | Inorganic Ion Transport and Metabolism |                                                                                                                                                                                                                                                                                                                                                                                                                                                                                    |                                                                                                                                                                               |
| 22                                         | FAC0AE180 | Fatty-acid-CoA thioesterase (octadecanoate)               | $h2o_c + stcoa_c \rightarrow coa_c + h_c + ocdca_c$               | Cell Envelope Biosynthesis             |                                                                                                                                                                                                                                                                                                                                                                                                                                                                                    |                                                                                                                                                                               |
| 23                                         | AACPS51   | Acyl-[acyl-carrier-protein] synthetase (n-C18:1)          | $ACP_c + atp_c + ocdcea_c \rightarrow amp_c + octeACP_c + ppi_c$  | Cell Envelope Biosynthesis             |                                                                                                                                                                                                                                                                                                                                                                                                                                                                                    |                                                                                                                                                                               |
| 24                                         | ADPT      | Adenine phosphoribosyltransferase                         | $ade_c + prpp_c \rightarrow amp_c + ppi_c$                        | Nucleotide Salvage Pathway             |                                                                                                                                                                                                                                                                                                                                                                                                                                                                                    |                                                                                                                                                                               |

Table S7. ALE phenotypes measurements

| Strain | Growth Rate (1/h) |            |                 |                 | Glucose uptake rate (mmol/gDW/h) |            |                 |                 | Acetate production rate (mmol/gDW/h) |            |                 |                 |
|--------|-------------------|------------|-----------------|-----------------|----------------------------------|------------|-----------------|-----------------|--------------------------------------|------------|-----------------|-----------------|
|        | Rate rep. 1       | Rate rep 2 | avg rep 1 and 2 | std rep 1 and 2 | Rate rep. 1                      | Rate rep 2 | avg rep 1 and 2 | std rep 1 and 2 | Rate rep. 1                          | Rate rep 2 | avg rep 1 and 2 | std rep 1 and 2 |
| 3      | 1.106             | 1.015      | <b>1.016</b>    | <b>0.001</b>    | 12.007                           | 12.55      | <b>12.278</b>   | <b>0.384</b>    | 7.76                                 | 7.708      | <b>7.734</b>    | <b>0.037</b>    |
| 4      | 0.943             | 0.953      | <b>0.948</b>    | <b>0.008</b>    | 11.677                           | 11.639     | <b>11.658</b>   | <b>0.027</b>    | 7.485                                | 7.522      | <b>7.504</b>    | <b>0.026</b>    |
| 6      | 1.008             | 1.021      | <b>1.014</b>    | <b>0.009</b>    | 12.91                            | 12.629     | <b>12.77</b>    | <b>0.199</b>    | 10.329                               | 9.763      | <b>10.046</b>   | <b>0.4</b>      |
| 7*     | 1.085             | 1.067      | <b>1.076</b>    | <b>0.013</b>    | 12.723                           | 12.948     | <b>12.835</b>   | <b>0.159</b>    | 6.062                                | 6.445      | <b>6.254</b>    | <b>0.271</b>    |
| 7A*    | 1.075             | 1.01       | <b>1.042</b>    | <b>0.046</b>    | 11.268                           | 10.407     | <b>10.837</b>   | <b>0.609</b>    | 5.432                                | 4.637      | <b>5.035</b>    | <b>0.562</b>    |
| 7B*    | 0.989             | 0.946      | <b>0.967</b>    | <b>0.031</b>    | 10.108                           | 10.135     | <b>10.122</b>   | <b>0.019</b>    | 3.786                                | 3.905      | <b>3.845</b>    | <b>0.084</b>    |
| 8      | 1.078             | 1.094      | <b>1.086</b>    | <b>0.012</b>    | 13.252                           | 13.355     | <b>13.304</b>   | <b>0.073</b>    | 8.224                                | 8.715      | <b>8.469</b>    | <b>0.348</b>    |
| 9      | 0.971             | 1.032      | <b>1.002</b>    | <b>0.043</b>    | 11.653                           | 13.446     | <b>12.549</b>   | <b>1.268</b>    | 7.925                                | 8.977      | <b>8.451</b>    | <b>0.744</b>    |
| 10     | 1.17              | 1.035      | <b>1.102</b>    | <b>0.095</b>    | 14.847                           | 13.623     | <b>14.235</b>   | <b>0.866</b>    | 11.841                               | 10.895     | <b>11.368</b>   | <b>0.669</b>    |

| Table S8. MG1655 WT phenotypes measurements.                                                                                                                                                                             |                   |                |                         |               |                         |               |                          |                  |  |                                                                           |
|--------------------------------------------------------------------------------------------------------------------------------------------------------------------------------------------------------------------------|-------------------|----------------|-------------------------|---------------|-------------------------|---------------|--------------------------|------------------|--|---------------------------------------------------------------------------|
| Strain No.                                                                                                                                                                                                               | Growth Rate (1/h) | Growth Rate CI | Glucose UR (mmol/gDW/h) | Glucose UR CI | Acetate PR (mmol/gDW/h) | Acetate PR CI | Biomass Yield (gDW/gGlc) | Biomass Yield CI |  | Data taken from:                                                          |
| 0                                                                                                                                                                                                                        | 0.69              | 0.02           | 8.59                    | 1.42          | 3.91                    | 1.14          | 0.44                     | 0.07             |  | Appl Environ Microbiol. 2015 Jan 1;81(1):17-30. doi: 10.1128/AEM.02246-14 |
| Cite from: LaCroix RA, et al. (2015) Use of adaptive laboratory evolution to discover key mutations enabling rapid growth of Escherichia coli K-12 MG1655 on glucose minimal medium. Appl Environ Microbiol 81(1):17–30. |                   |                |                         |               |                         |               |                          |                  |  |                                                                           |

Table S9. NCM3722 uptake titration phenotypes

| Growth (1/hr) | Glucose uptake (mM/OD600/hr) | Acetate excretion rate (mmol/OD600/hr) |
|---------------|------------------------------|----------------------------------------|
| 0.88          | 5.58                         | 1.88                                   |
| 0.81          | 4.94                         | 0.7                                    |
| 0.75          | 4.31                         | 0                                      |
| 0.71          | 3.9                          | 0                                      |
| 0.68          | 3.94                         | 0                                      |
| 0.58          | 3.25                         | 0                                      |
| 0.97          | 5.4                          | 2.52                                   |
| 0.94          | 4.97                         | 2.37                                   |
| 0.91          | 5.48                         | 2.38                                   |
| 0.88          | 5.11                         | 1.94                                   |
| 0.87          | 5.15                         | 1.5                                    |
| 0.81          | 4.69                         | 1.16                                   |
| 0.78          | 4.46                         | 0.03                                   |
| 0.74          | 4.21                         | 0                                      |

**Growth yield (gDW/g\_glucose) = Growth (1/hr) / Glucose uptake (mM/OD600/hr) / 180.1559 (g/mol) / 2 (mM/OD600/(mmol/gDW)) \* 1000 (mmol/mol)**

Cite from: Basan M, et al. (2015) Overflow metabolism in Escherichia coli results from efficient proteome allocation. Nature 528(7580):99–104.

| Table S10. MG1655 chemostat measurements                                                                                                                             |                              |                                                        |
|----------------------------------------------------------------------------------------------------------------------------------------------------------------------|------------------------------|--------------------------------------------------------|
| Growth (1/hr)                                                                                                                                                        | Growth Yield (gDW/g_glucose) | Acetate concentration ((g_acetate/L) / (g_glucose/L) ) |
| 0.047216035634744                                                                                                                                                    | 0.229224178287206            | 0                                                      |
| 0.0436525612472161                                                                                                                                                   | 0.271268069169989            | 0                                                      |
| 0.0579064587973274                                                                                                                                                   | 0.282710340033762            | 0                                                      |
| 0.0846325167037862                                                                                                                                                   | 0.28585249599251             | 0                                                      |
| 0.0962138084632517                                                                                                                                                   | 0.318955073553403            | 0                                                      |
| 0.114031180400891                                                                                                                                                    | 0.323385300668152            | 0                                                      |
| 0.0472160356347439                                                                                                                                                   | 0.337504433064276            | 0                                                      |
| 0.110467706013363                                                                                                                                                    | 0.36097059282482             | 0                                                      |
| 0.121158129175947                                                                                                                                                    | 0.353310257756089            | 0                                                      |
| 0.205790645879733                                                                                                                                                    | 0.374831543557516            | 0                                                      |
| 0.187973273942094                                                                                                                                                    | 0.371675201793086            | 0                                                      |
| 0.212026726057907                                                                                                                                                    | 0.38182798292029             | 0                                                      |
| 0.285968819599109                                                                                                                                                    | 0.375977756656689            | 0                                                      |
| 0.315367483296214                                                                                                                                                    | 0.38102648489921             | 0                                                      |
| 0.301113585746102                                                                                                                                                    | 0.383596952888939            | 0                                                      |
| 0.405345211581292                                                                                                                                                    | 0.401902316542068            | 0.791068580542264                                      |
| 0.40890868596882                                                                                                                                                     | 0.391705559417247            | 0                                                      |
| 0.398218262806236                                                                                                                                                    | 0.396181181110181            | 0                                                      |
| 0.512249443207127                                                                                                                                                    | 0.418929539103173            | 0.284822606499937                                      |
| 0.547884187082405                                                                                                                                                    | 0.418872795880442            | 1.15051139829487                                       |
| 0.587082405345212                                                                                                                                                    | 0.414988722284482            | 1.65944136297221                                       |
| 0.692204899777283                                                                                                                                                    | 0.375330883917552            | 3.0208247627424                                        |
| washout=0.7 (1/hr)                                                                                                                                                   |                              |                                                        |
| Acetate excretion rate= Acetate concentration / washout                                                                                                              |                              |                                                        |
| Glucose uptake rate= Growth / Growth Yield / 180.1559 * 1000                                                                                                         |                              |                                                        |
| Cite from: Nanchen A, Schicker A, Sauer U (2006) Nonlinear dependency of intracellular fluxes on growth rate in miniaturized continuous cultures of Escherichia coli |                              |                                                        |
